## RESEARCH ARTICLE

## Gender-based vulnerability in women who inject drugs in a harm reduction setting

Jorge Valencia<sup>1,2\*</sup>, Alejandro Alvaro-Meca<sup>3</sup>, Jesús Troya<sup>4</sup>, Jorge Gutiérrez<sup>2</sup>, Cristina Ramón<sup>2</sup>, Antonio Rodríguez<sup>2</sup>, Sonia Vázquez-Morón<sup>5,6</sup>, Salvador Resino<sup>6</sup>, Santiago Moreno<sup>7</sup>, Pablo Ryan<sup>4,8,9</sup>

**1** Harm Reduction Unit “SMASD”; Subdirección General de Adicciones; SERMAS, Madrid, Spain, **2** Non-Governmental Organization “Madrid Positivo”, Madrid, Spain, **3** Unit of Preventive Medicine and Public Health, Rey Juan Carlos University, Alcorcon, Madrid, Spain, **4** Hospital Universitario Infanta Leonor, Madrid, Spain, **5** Fundación Estatal, Salud, Infancia y Bienestar Social (FCSAI), Madrid, Spain, **6** Unit of Viral Infection and Immunity, National Center for Microbiology, Institute of Health Carlos III, Majadahonda, Madrid, Spain, **7** Department of Infectious Diseases, Ramón y Cajal Hospital, IRYCIS, University of Alcalá de Henares, Madrid, Spain, **8** Complutense de Madrid University (UCM), Madrid, Spain, **9** Instituto de Investigación Sanitaria Gregorio Marañón (IISGM), Madrid, Spain

✉ These authors contributed equally to this work.

\* [jorge\\_vlr@yahoo.es](mailto:jorge_vlr@yahoo.es)

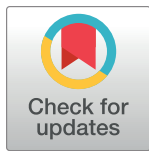

## OPEN ACCESS

**Citation:** Valencia J, Alvaro-Meca A, Troya J, Gutiérrez J, Ramón C, Rodríguez A, et al. (2020) Gender-based vulnerability in women who inject drugs in a harm reduction setting. PLoS ONE 15(3): e0230886. <https://doi.org/10.1371/journal.pone.0230886>

**Editor:** Gabriele Fischer, Medizinische Universität Wien, AUSTRIA

**Received:** November 7, 2019

**Accepted:** March 10, 2020

**Published:** March 30, 2020

**Copyright:** © 2020 Valencia et al. This is an open access article distributed under the terms of the [Creative Commons Attribution License](https://creativecommons.org/licenses/by/4.0/), which permits unrestricted use, distribution, and reproduction in any medium, provided the original author and source are credited.

**Data Availability Statement:** Availability of data of patients attended at certain public institutions in Spain is limited by the Data Protection Law (Ley de Protección de Datos). Data of patients included in this report may be available from the Subdirección General de Adicciones (Madrid, Spain) Institutional Data Access for researchers who meet the criteria for confidential data (contact Elisa Alba Yague; e-mail: [elba.agad@salud.madrid.org](mailto:elba.agad@salud.madrid.org)).

**Funding:** JV has received research grants and honoraria for lectures from Gilead Sciences and

## Abstract

### Background and aims

In comparison with men, women who use drugs (WWUD) have considerably more frequent and intense experiences with interpersonal violence, sexual abuse and trauma. The aim of this study was to identify issues related to gender-based vulnerability in a group of WWUD attended in a harm reduction facility in Madrid, Spain.

### Material and methods

A cross-sectional study was conducted during a screening of blood borne infections. We included WWUD (smoked or injected heroin/cocaine) who were actively screened for HIV, HBV and HCV in a harm reduction setting in Madrid (Spain) from January to December 2017. WWUD were interviewed for gender-based abuse or violence using a face-to-face questionnaire by a trained interviewer. Aspects related to their social-epidemiological condition and gender-based vulnerability were collected.

### Results

We included 109 women who were actively using drugs. The median age was 39 (IQR 35–47) years, 84.4% were Spanish born, 22.9% were homeless, 43 (41.7%) had ever used injected drugs, 29 (26.6%) were currently using injected drugs, and 27.1% had mental health disorders. Aspects related to gender-based vulnerability were collected. Among those surveyed, they reported having ever suffered emotional or psychological damage (88%), having experienced at least one incident of serious physical injury by a male partner (71%), and having ever suffered sexual abuse (49%). In addition, 28% had ever exchanged sex for money/drugs. When compared to women that did not use injecting drugs, those who

travel grants from Gilead Sciences, ViiV, Merck and Janssen; SM has been involved in speaking activities and has received grants for research from Abbott, Boehringer&Ingelheim, Bristol-Myers Squibb, Gilead, Glaxo Smith Kline, Janssen Cilag, Merck Sharp&Dohme, Pfizer, Roche, and Schering Plough.; JT has received honoraria for talks from Gilead and Merck; PR has received grant/research support from Merck, Gilead, Janssen, AbbVie and ViiV. Other authors declare that they have no conflicts of interest.

**Competing interests:** This work has been funded by a research grant from Merck Sharpe & Dohme (MISP IIS#54846). The funders had no role in study design, data collection and analysis, decision to publish, or preparation of the manuscript. This does not alter our adherence to PLOS ONE policies on sharing data and materials.

injected drugs had more frequently exchanged sex for money/drugs (55% vs 21%,  $p = 0.003$ ).

## Conclusions

A high proportion of WWUD suffer psychological or physical violence by partners denoting gender-based vulnerability. Interventions in harm reduction settings with a multidisciplinary and gender-based approach should be implemented.

## Background

In a recent report, evidence of intravenous drug use (IDU) was reported in 179 of 206 countries or territories. Among an estimated 15.6 million people who inject drugs (PWID), 3.2 (1.6–5.1) million are women. The percentage of women who inject drugs (WWID) varies substantially across regions, ranging from 3.1% to 33% of all PWID [1]. The prevalence of IDU among men is far higher than in women in all regions.

Evidence of risk of HIV, viral hepatitis and sexually transmitted diseases has been demonstrated in WWID with inadequate emphasis on human rights. WWID are among the most vulnerable through both unsafe injections and unprotected sex [2]. Despite the fact that current drug use is higher among males than females [3], several studies have shown that injection practices among women may put them at a higher risk [4–7]. Some reports illustrate that women who use drugs (WWUD) are sexually active and have multiple sex partners including clients of sex work. Transient relationships are reported and many of them engage in unprotected sex [8] and some type of violence [9].

WWID in the US face high levels of stigma, punishing drug laws, increasing rates of drug-related incarceration and restricted access to harm reduction services, specifically gender-sensitive services [10]. In Canada, the increase in overdoses in British Columbia has increased violence against WWID, particularly among poor, homeless, transgender and indigenous women. Rapid and severe intoxication or overdose from fentanyl-laced opioids leave them vulnerable to thefts and physical and/or sexual assault, often from the same men who offered them the drugs [11,12]. Currently, there is a global need to improve data collection and reporting of gender-disaggregated information (prevalence of key infections, gender-based violence, prevention and treatment service access and program coverage) [11].

Due to the current scarcity and relevance of this information in harm reduction settings, the aim of our study was to identify issues related to gender-based vulnerability in women who used drugs and were attended in a low-threshold mobile harm reduction unit (LTMHRU).

## Material and methods

### Study sample and ethical considerations

Participants included in the study were women aged  $\geq 18$  years-old who self-reported active use of cocaine or heroin, and who were followed by a comprehensive multidisciplinary team of a LTMHRU. This unit offers several services, including needle and syringe exchange, opiate substitution therapy (OST), addiction treatment, frequent testing and treatment for infectious diseases and other comorbidities (psychiatric, chronic diseases. . .), prevention counselling, coverage of basic needs, and social support. All women included were recruited after their participation in a screening program for blood borne viral infections (HIV, HCV, HBV and

syphilis) using dried blood spot and syphilis through of a mobile van located next to the LTMHRU in a shantytown located in Madrid (Spain), from January to December 2017. This specific group of WWUD is characterized by frequent relapses, few or shorter periods of abstinence, impaired physical conditions, poor access to standard medical care, and be socially excluded and marginalized.

## Measurements

Data on social and demographic details, history of drug abuse, sexual risk behaviors, acceptability of the screening test and a short questionnaire related to gender-based vulnerability were recorded. All WWUD who came to the screening site were proposed to participate in this study. After agreement, an informed consent was signed. Participation consisted on a confidential and voluntary interview (face-to-face) by a woman nurse hired specifically for that purpose in a closed space located inside the mobile van. The questionnaire consisted of short questions of interpersonal violence exerted by the intimate-partner or related to sexual trade (money or others benefits such as drugs, food or housing) produced over time (childhood, adult, ever during lifetime, remote, or recent) and included sexual abuse, emotional or psychological damage and physical injury. All interviews were completed in one sitting and lasted approximately 10–15 minutes and the participants were informed that they could interrupt the questionnaire at any time during the interview.

For the purpose of this study, the following definitions were considered.

- Sexual abuse during adulthood was defined as pressured or forced vaginal or anal sex using violence or being threatened or hurt with a weapon produced by any perpetrator.
- Emotional or psychological damage was defined by traumas or extraordinarily stressful events that occur repeatedly and shatter her sense of security produced by any perpetrator.
- Serious physical injury meant an injury that caused a reasonable risk of death or caused serious or permanent disfigurement or caused significant physical pain or caused serious impairment of health produced by any perpetrator.

## Ethics statements

The research project was approved by the Research Committee at Hospital Universitario Infanta Leonor (HUIL) and the Ethics Committee of Hospital General Universitario Gregorio Marañón and Instituto de Salud Carlos III (ISCIII).

No money compensation was given to patients.

## Statistical analysis

Frequencies and percentages were calculated for dichotomous variables and median and interquartile range (IQR) were calculated for continuous variables. Pearson's chi-square tests were used to assess if issues related to gender-based vulnerability were associated with injecting drugs among WWUD. Data were collected and managed using Research Electronic Data Capture (Redcap), and analyses were performed using R software (R Foundation, Vienna, Austria).

## Results

During the period of the study, information was obtained from 529 drug users who participated in the screening program. Among them, 109 (20.6%) women who accepted to be

interviewed, were included in the study. None of them refused to participate. Baseline characteristics of the women included in the study are shown in Table 1. Overall, the median age was 39 (IQR: 35–47); 92 (84.4%) were Spanish-born, 25 (22.9%) were homeless or unstably housed, and 29 (27.1%) had mental health disorders (MHD). In relation to injecting behaviors, 43 (41.7%) had ever used injected drugs and 29 (26.6%) were currently using injected drugs, 32 (29.4%) used drugs daily and 96 (88.1%) reported cocaine as the drug they had “most often used”, 24 (25.5%) had relapsed in substance use in the prior year, and 28 (27.5%) were engaged on OST.

All WWUD interviewed reported one or more gender-based vulnerability issues. In total, 92 (88.5%) of the women interviewed had ever suffered emotional or psychological damage by a partner. Seventy-four (71.2%) women reported having experienced at least one incident of serious physical injury, and 51 (49%) had ever suffered sexual abuse. Thirty-one (28.4%) women admitted to have ever exchange sex for money/drugs, though 18 (17.1%) did not answer to this question; 47 (44.3%) had a stable partner, all of whom used drugs.

The Table 2. shows the comparison of gender-based vulnerability among WWID (n = 29) and women who use non-injectable drugs (n = 80). In this analysis, no differences were found with the exception of a higher frequency of sex exchange for money/drugs in WWID (53.6%) than in those who used non-injectable drugs (20.8%) (p = 0.003).

The Table 3. shows a comparison of variables associated to gender-based vulnerability among WWUD who live with HIV and WWUD uninfected by HIV. No differences were found among WWUD according to their HIV status.

**Table 1. Characteristics of 109 women who use drugs\*.**

|                                          | N = 109    |
|------------------------------------------|------------|
| <b>Sociodemographic</b>                  |            |
| Age, years (median, IQR)                 | 39 (35–47) |
| Spanish born                             | 92 (84.4)  |
| Homeless**                               | 25 (22.9)  |
| HIV positive                             | 7 (6.4)    |
| Mental health disorders                  | 29 (27.1)  |
| <b>Addiction-related characteristics</b> |            |
| Current way of administration of drugs   |            |
| Injected <sup>†</sup>                    | 29 (26.6)  |
| Smoked <sup>†</sup>                      | 89 (81.7)  |
| Snorted <sup>†</sup>                     | 23 (21.1)  |
| Daily use of the drugs                   | 32 (29.4)  |
| Intravenous drug use ever                | 43 (41.7)  |
| Sharing paraphernalia**                  | 21 (40.4)  |
| Relapse in drugs in the last year        | 24 (25.5)  |
| On OST                                   | 28 (27.5)  |
| <b>Sexual behavior</b>                   |            |
| Stable partner                           | 47 (44.3)  |
| High sexual risk behavior**              | 23 (25.6)  |
| Use of contraceptives                    | 59 (57.8)  |
| Exchange sex for money/drugs             | 31 (28.4)  |

\* Expressed as n (%) unless indicated otherwise

\*\*In the past 12 months.

<sup>†</sup> multiresponse, the sum exceeds 100%

IQR: interquartile range; OST: opiate substitution therapy

<https://doi.org/10.1371/journal.pone.0230886.t001>

**Table 2. Variables associated to gender-based vulnerability among women according to the use of injectable drugs.**

| Variables                                             | WWID      | WWNID     | p-value |
|-------------------------------------------------------|-----------|-----------|---------|
|                                                       | N = 29; % | N = 80; % |         |
| Emotional or psychological damage by any partner ever | 26 (96.3) | 66 (85.7) | 0.258   |
| Serious physical injury by any partner ever           | 19 (70.4) | 55 (71.4) | 0.999   |
| Sexual abuse by any partner ever                      | 13 (48.1) | 38 (49.4) | 0.999   |
| Engaged in sex exchange for money/drugs ever          | 15 (53.6) | 16 (20.8) | 0.003   |

WWID: women who use injectable drugs; WWNID: women who use non-injectable drugs

<https://doi.org/10.1371/journal.pone.0230886.t002>

## Discussion

The prevalence of gender-based vulnerability found in our study population was extremely high and similar to that found in other studies that describe a syndemic of substance abuse, partner violence, HIV, mental illness, and social instability [13–18]. All the women who participated in this study had suffered at least one act of physical or psychological violence caused by their partners.

Overall, almost half of the WWUD in this study had a stable partner and all of them used drugs. Many cases of these relationships with other drug users act as a form of protection, although are usually abusive and economically parasitical to the women [16]. Multiple studies have found that WWID are more likely than their male counterparts to have a sexual partner who injects drugs and this may reflect the greater social isolation [19–21] and their scarce social and familiar support.

On the other hand, although we believe that the proportion of WWUD who exchanged sex for money/drugs was underestimated in our study due to the study characteristics, we found that 30% of them were engaged in transactional sex for money/drugs and it was statistically higher (53.6%) in WWID than in women who use non-injectable drugs. This subgroup of WWID faces high levels of violence, abuse and sexual assault [19, 22]; indeed, many of them sell sex to finance their own and their partner's drug habit and often their partner exerts a significant amount of control over their sex work, decreased negotiation about condom use and increasing unsafe injection practices [2, 13].

Rates of gender-based and intimate partner violence are two to five times higher among WWID than women who do not use drugs [23]. Remarkably and similar to the findings of our study, over half of all interviewed women reported having experienced sexual violence in their lifetime [24,25] and strikingly, three-quarters of women had ever experienced some degree of physical or emotional violence by their partners. Unfortunately, this behavior is permanent because of the financial dependence on the partner for housing, drug supply, and fear [26]

**Table 3. Variables associated to gender-based vulnerability among women according to their HIV status.**

| Variables                                             | HIV+     | HIV-       | p-value |
|-------------------------------------------------------|----------|------------|---------|
|                                                       | N = 7; % | N = 102; % |         |
| Emotional or psychological damage by any partner ever | 7 (100)  | 85 (87.6)  | 0.706   |
| Serious physical injury by any partner ever           | 5 (71.4) | 69 (71.1)  | 0.999   |
| Sexual abuse by any partner ever                      | 5 (71.4) | 46 (47.4)  | 0.403   |
| Engaged in sex exchange for money/drugs ever          | 3 (42.9) | 28 (28.6)  | 0.710   |

WWID: women who use injectable drugs; WWNID: women who use non-injectable drugs; HIV: human immunodeficiency virus

<https://doi.org/10.1371/journal.pone.0230886.t003>

These high levels of gender-based vulnerability was not significantly different for WWID and women who use non-injectable drugs. Our findings agree with those of a qualitative study that showed that sexual and reproductive health needs of women who inject drugs and those who use drugs through non-injectable routes are largely similar [8]. Indeed, gender specific needs may often be overlooked in WWUD and therefore, there is a huge unmet need to provide psychologic and social support, including financial assistance, housing assistance, self-esteem and empowerment training, sexual health education and legal advice. Currently, healthcare systems and individual providers may be poorly equipped with resources to engage abused women, especially those with active substance use disorders. It could require the development of gender-specific medical and social outreach services [13] to more effectively engage WWUD in sexual transmission and blood-borne infections and gender-based violence prevention, and insert it in women's harm reduction settings.

Our study has several limitations to be considered. First, the sample size is small and could have limited the power to detect differences in potential covariates such as HIV status and injecting-drug use; however, the proportion of WWUD in cohort studies of PWID actively are traditionally low and women are usually under-represented. Second, this study focuses exclusively in women who were attended in a harm reduction program and with a chaotic lifestyle, which may not be generalizable to other populations of WWUD or other types of substances abuse. Third, vulnerability was not assessed using gender-violence specific scales or scores [27,28]; however, given the importance of the results and the lack of information on gender-based vulnerability related to severe substance abuse in a harm reduction setting in Madrid, Spain [15,29], we found our findings very relevant. Fourth, an information bias (interview face-to-face) is possible, but a trained female nurse and a short questionnaire could have minimized this issue. Fifth, the results on drug use and violent events were based on self-report measures rather than urine toxicology or other factual evidence. In the same way, the diagnosis of MHD was self-reported by patients and it was not assessed in-depth. This could have underestimated and explained the low prevalence found and be a bias due to this MHD is one of the most relevant vulnerability factors in WWID.

### Implications for practice and/or policy

Women who used drugs in our study suffered various forms of sexual, physical and psychological violence. We note that these results provide particularly strong evidence for the implementation of programs focused in violence support and prevention in women who use drugs in a harm reduction setting. These issues should generate policies of detection early signs of abuse or violence promoting derivation to specialized public services and strengthening women's empowerment activities. Drug policy makers should also create specific resources including housing and psychological support for women who suffer gender-based violence and cannot or do not want to stop using drugs.

### Conclusions

In summary, a high proportion of WWUD suffer psychological or physical violence by partners denoting gender-based vulnerability that requires and urgent, multidisciplinary approach and support services adapted to the needs of these women.

### Acknowledgments

We acknowledge the patients' involvement in this study, multidisciplinary team of the LTMRHU named "SMASD" and the Non-Governmental Organization "Madrid Positivo".

## Author Contributions

**Conceptualization:** Jorge Valencia, Jorge Gutiérrez, Cristina Ramón, Antonio Rodríguez, Pablo Ryan.

**Data curation:** Jorge Valencia, Sonia Vázquez-Morón.

**Formal analysis:** Jorge Valencia, Alejandro Alvaro-Meca, Salvador Resino.

**Funding acquisition:** Jorge Valencia, Pablo Ryan.

**Investigation:** Jorge Valencia, Pablo Ryan.

**Methodology:** Jorge Valencia, Alejandro Alvaro-Meca, Cristina Ramón.

**Project administration:** Jorge Valencia, Jorge Gutiérrez, Pablo Ryan.

**Resources:** Jorge Valencia, Jesús Troya, Jorge Gutiérrez, Salvador Resino, Pablo Ryan.

**Software:** Salvador Resino.

**Supervision:** Jorge Valencia, Santiago Moreno, Pablo Ryan.

**Validation:** Jorge Valencia, Sonia Vázquez-Morón, Santiago Moreno, Pablo Ryan.

**Visualization:** Jorge Valencia, Santiago Moreno, Pablo Ryan.

**Writing – original draft:** Jorge Valencia, Antonio Rodríguez, Santiago Moreno.

**Writing – review & editing:** Jorge Valencia, Jesús Troya, Jorge Gutiérrez, Santiago Moreno, Pablo Ryan.

## References

1. Degenhardt L, Peacock A, Colledge S, Leung J, Grebely J, Vickerman P, et al. Global prevalence of injecting drug use and sociodemographic characteristics and prevalence of HIV, HBV, and HCV in people who inject drugs: a multistage systematic review. *The Lancet Global Health*. 2017; 5(12):e1192–e207. [https://doi.org/10.1016/S2214-109X\(17\)30375-3](https://doi.org/10.1016/S2214-109X(17)30375-3) PMID: 29074409
2. Azim T, Bontell I, Strathdee SA. Women, drugs and HIV. *International Journal of Drug Policy*. 2015; 26: S16–S21. <https://doi.org/10.1016/j.drugpo.2014.09.003> PMID: 25277726
3. Lansky A, Finlayson T, Johnson C, Holtzman D, Wejnert C, Mitsch A, et al. Estimating the number of persons who inject drugs in the United States by meta-analysis to calculate national rates of HIV and hepatitis C virus infections. *PloS one*. 2014; 9(5):e97596. <https://doi.org/10.1371/journal.pone.0097596> PMID: 24840662
4. Evans JL, Hahn JA, Page-Shafer K, Lum PJ, Stein ES, Davidson PJ, et al. Gender differences in sexual and injection risk behavior among active young injection drug users in San Francisco (the UFO Study). *Journal of Urban Health*. 2003; 80(1):137–46. <https://doi.org/10.1093/jurban/jtg137> PMID: 12612103
5. Morris MD, Evans J, Montgomery M, Yu M, Briceno A, Page K, et al. Intimate injection partnerships are at elevated risk of high-risk injecting: a multi-level longitudinal study of HCV-serodiscordant injection partnerships in San Francisco, CA. *PloS one*. 2014; 9(10):e109282. <https://doi.org/10.1371/journal.pone.0109282> PMID: 25286346
6. Tracy D, Hahn JA, Lewis CF, Evans J, Briceño A, Morris MD, et al. Higher risk of incident hepatitis C virus among young women who inject drugs compared with young men in association with sexual relationships: a prospective analysis from the UFO Study cohort. *BMJ open*. 2014; 4(5):e004988. <https://doi.org/10.1136/bmjopen-2014-004988> PMID: 24875490
7. Park JN, Footer KH, Decker MR, Tomko C, Allen ST, Galai N, et al. Interpersonal and structural factors associated with receptive syringe-sharing among a prospective cohort of female sex workers who inject drugs. *Addiction*. 2019.
8. Sharma V, Sarna A, Tun W, Saraswati LR, Thior I, Madan I, et al. Women and substance use: a qualitative study on sexual and reproductive health of women who use drugs in Delhi, India. *BMJ open*. 2017; 7(11):e018530. <https://doi.org/10.1136/bmjopen-2017-018530> PMID: 29158326

9. Davis A, Jiwatram-Negrón T, Primbetova S, Terlikbayeva A, Bilokon Y, Chubukova L, et al. Multi-level risk factors associated with sex trading among women living with HIV in Kazakhstan: A neglected key population. *International journal of STD & AIDS*. 2017; 28(14):1397–404.
10. Boyd J, Collins AB, Mayer S, Maher L, Kerr T, McNeil R. Gendered violence and overdose prevention sites: a rapid ethnographic study during an overdose epidemic in Vancouver, Canada. *Addiction*. 2018; 113(12):2261–70. <https://doi.org/10.1111/add.14417> PMID: 30211453
11. Iversen J, Page K, Madden A, Maher L. HIV, HCV and health-related harms among women who inject drugs: Implications for prevention and treatment. *Journal of acquired immune deficiency syndromes (1999)*. 2015; 69(0 1):S176.
12. Malinowska-Sempruch K, Rychkova O, Foundations OS. *The impact of drug policy on women: Open Society Foundations* New York, NY; 2015.
13. Meyer JP, Springer SA, Altice FL. Substance abuse, violence, and HIV in women: a literature review of the syndemic. *Journal of women's health*. 2011; 20(7):991–1006. <https://doi.org/10.1089/jwh.2010.2328> PMID: 21668380
14. Loeliger KB, Marcus R, Wickersham JA, Pillai V, Kamarulzaman A, Altice FL. The syndemic of HIV, HIV-related risk and multiple co-morbidities among women who use drugs in Malaysia: important targets for intervention. *Addictive behaviors*. 2016; 53:31–9. <https://doi.org/10.1016/j.addbeh.2015.09.013> PMID: 26436520
15. Caldentey C, Tirado-Munoz J, Ferrer T, Fonseca F, Rossi P, Mestre-Pintó JI, et al. Intimate partner violence among female drug users admitted to the general hospital: screening and prevalence *Violencia de género en mujeres con consumo de sustancias ingresadas en el hospital general: cribado y prevalencia*. *Adicciones*. 2017; 29(3):172–9. <https://doi.org/10.20882/adicciones.738> PMID: 27749969
16. Bourgeois P, Prince B, Moss A. The everyday violence of hepatitis C among young women who inject drugs in San Francisco. *Human organization*. 2004; 63(3):253. <https://doi.org/10.17730/humo.63.3.h1phxbhrb7m4mlv0> PMID: 16685288
17. Higgins JA, Hoffman S, Dworkin SL. Rethinking gender, heterosexual men, and women's vulnerability to HIV/AIDS. *American journal of public health*. 2010; 100(3):435–45. <https://doi.org/10.2105/AJPH.2009.159723> PMID: 20075321
18. Stoicescu C, Ameilia R, Praptoraharjo I, Mahanani M. Syndemic and synergistic effects of intimate partner violence, crystal methamphetamine, and depression on hiv sexual risk behaviors among women who inject drugs in Indonesia. *Journal of urban health*. 2019; 96(3):477–96. <https://doi.org/10.1007/s11524-019-00352-6> PMID: 30874946
19. Pinkham S, Stoicescu C, Myers B. Developing effective health interventions for women who inject drugs: key areas and recommendations for program development and policy. *Advances in preventive medicine*. 2012;2012.
20. Doherty MC, Garfein RS, Monterroso E, Brown D, Vlahov D. Correlates of HIV infection among young adult short-term injection drug users. *Aids*. 2000; 14(6):717–26. <https://doi.org/10.1097/00002030-200004140-00011> PMID: 10807195
21. MacRae R, Aalto E. Gendered power dynamics and HIV risk in drug-using sexual relationships. *AIDS care*. 2000; 12(4):505–16. <https://doi.org/10.1080/09540120050123909> PMID: 11091783
22. Shannon K, Kerr T, Allinott S, Chettiar J, Shoveller J, Tyndall MW. Social and structural violence and power relations in mitigating HIV risk of drug-using women in survival sex work. *Social science & medicine*. 2008; 66(4):911–21.
23. El-Bassel N, Wechsberg WM, Shaw SA. Dual HIV risk and vulnerabilities among women who use or inject drugs: no single prevention strategy is the answer. *Current opinion in HIV and AIDS*. 2012; 7(4):326. <https://doi.org/10.1097/COH.0b013e3283536ab2> PMID: 22498480
24. Collazo-Vargas EM, Dodge B, Herbenick D, Guerra-Reyes L, Mowatt R, Otero-Cruz IM, et al. Sexual behaviors, experiences of sexual violence, and substance use among women who inject drugs: accessing health and prevention services in Puerto Rico. *Puerto Rico health sciences journal*. 2018; 37(2):88–97. PMID: 29905919
25. Gilbert L, Jiwatram-Negron T, Nikitin D, Rychkova O, McCrimmon T, Ermolaeva I, et al. Feasibility and preliminary effects of a screening, brief intervention and referral to treatment model to address gender-based violence among women who use drugs in Kyrgyzstan: Project WINGS (Women Initiating New Goals of Safety). *Drug and alcohol review*. 2017; 36(1):125–33. <https://doi.org/10.1111/dar.12437> PMID: 27770541
26. El-Bassel N, Gilbert L, Witte S, Wu E, Chang M. Intimate partner violence and HIV among drug-involved women: contexts linking these two epidemics—challenges and implications for prevention and treatment. *Substance use & misuse*. 2011; 46(2–3):295–306.



27. Cascardi M, Blank S, Dodani V. Comparison of the CADRI and CTS2 for measuring psychological and physical dating violence perpetration and victimization. *Journal of interpersonal violence*. 2016;0886260516670182.
28. Tirado-Muñoz J, Gilchrist G, Fischer G, Taylor A, Moskalewicz J, Giammarchi C, et al. Psychiatric comorbidity and intimate partner violence among women who inject drugs in Europe: a cross-sectional study. *Archives of women's mental health*. 2018; 21(3):259–69. <https://doi.org/10.1007/s00737-017-0800-3> PMID: [29230558](https://pubmed.ncbi.nlm.nih.gov/29230558/)
29. Javier F-M, Javier L-G.J. Addressing intimate partner violence in substance-abuse treatment programmes: a challenge for the future. *Adicciones*. 2011; 23(1).
